# Supplementary material for: International Epidemic Intelligence at the Institut de Veille Sanitaire, France
Source: PubMed Central journal article supplement (PMC2851537; doi:10.3201/eid1310.070522), 2007-10
Supplement: 07-0522_appT-s1.pdf [file 07-0522_appT-s1.pdf]

Appendix Table. Events posted in the BHI from May 17, through December 27, 2006, by source of the first signal\*

| Source of the first signal          | No. events (%) |
|-------------------------------------|----------------|
| GPHIN                               | 63 (36)        |
| World Health Organization network   | 51 (29)        |
| ProMED-mail                         | 30 (17)        |
| Agence France Presse                | 11 (6)         |
| Office International des Epizooties | 9 (5)          |
| Ministries                          | 7 (4)          |
| French Health Directorate           | 2 (1)          |
| Regional surveillance networks      | 1 (0.6)        |
| Scientific peer-reviewed literature | 1 (0.6)        |
| Electronic discussion group         | 1 (0.6)        |
| Total                               | 176 (100)      |

\*BHI, Bulletin Hebdomadaire International; GPHIN, Global Public Health Intelligence Network.
